# Supplementary material for: Probiotics as an Alternative to Antibiotics: Genomic and Physiological Characterization of Aerobic Spore Formers from the Human Intestine
Source: MDPI journal article supplement (doi:10.3390/microorganisms11081978), 2023-07-31
Supplement: s1 [file s1]

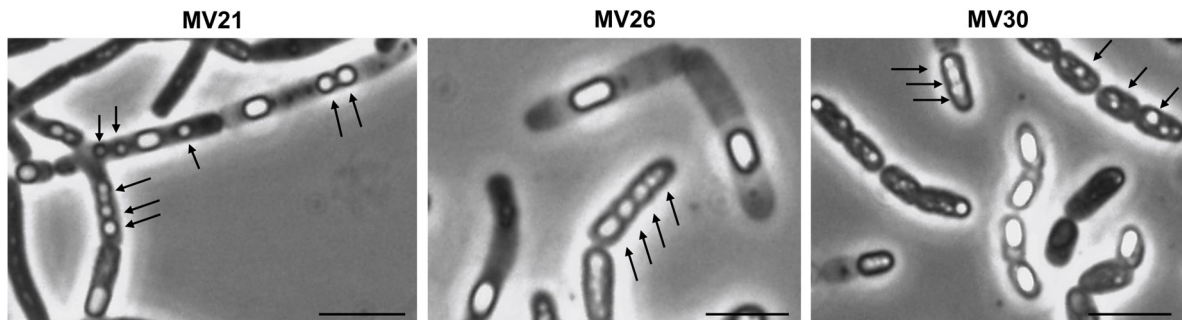

Figure S1: Microscopy analysis of strains producing parasporal structures (arrows)

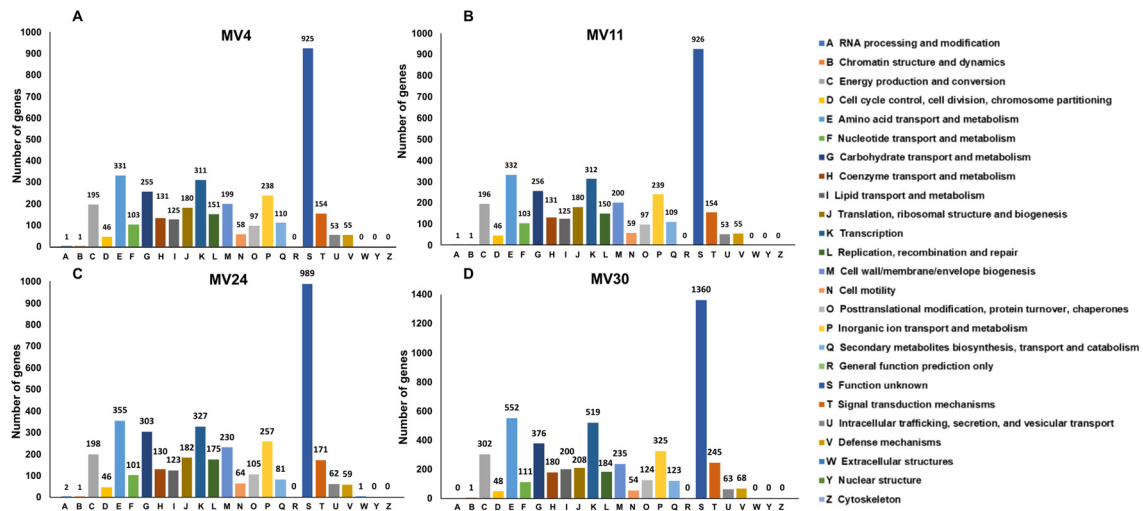

Figure S2: The COG function annotation of *B. velezensis* MV4 (A) and MV11 (B), *B. subtilis* MV24 (C) and *P. megaterium* MV30 (D)

## Supplementary Tables

**Table S1.** Hemolytic activity on blood agar plates.

| Strain | Hemolysis | Strain | Hemolysis |
|--------|-----------|--------|-----------|
| MV2    | $\alpha$  | MV19   | $\beta$   |
| MV3    | $\beta$   | MV20   | $\gamma$  |
| MV4    | $\gamma$  | MV21   | $\alpha$  |
| MV5    | $\alpha$  | MV22   | $\alpha$  |
| MV6    | $\gamma$  | MV23   | $\alpha$  |
| MV7    | $\alpha$  | MV24   | $\gamma$  |
| MV8    | $\alpha$  | MV25   | $\alpha$  |
| MV9    | $\alpha$  | MV26   | $\gamma$  |
| MV10   | $\alpha$  | MV27   | $\alpha$  |
| MV11   | $\gamma$  | MV28   | $\alpha$  |
| MV12   | $\alpha$  | MV29   | $\alpha$  |
| MV13   | $\alpha$  | MV30   | $\gamma$  |
| MV14   | $\gamma$  | MV31   | $\alpha$  |

|      |          |      |          |
|------|----------|------|----------|
| MV15 | $\gamma$ | MV32 | $\alpha$ |
| MV16 | $\alpha$ | MV33 | $\alpha$ |
| MV17 | $\gamma$ |      |          |

**Table S2. Toxin genes present in the genomes of MV4, MV11, MV24 and MV30**

| <b>Toxin</b>                                                 | <b>Related genes</b> | <b>MV4</b> | <b>MV11</b> | <b>MV24</b> | <b>MV30</b> | <b><i>B.cereus</i><br/>ATCC<br/>14579</b> | <b><i>B.clausii</i><br/>KSM-<br/>K16</b> | <b><i>B.subtilis</i><br/>subsp.<br/><i>subtilis</i> str.<br/>168</b> |
|--------------------------------------------------------------|----------------------|------------|-------------|-------------|-------------|-------------------------------------------|------------------------------------------|----------------------------------------------------------------------|
| <b>Anthrax toxin</b>                                         | <i>cya</i>           | -          | -           | -           | -           | -                                         | -                                        | -                                                                    |
|                                                              | <i>lef</i>           | -          | -           | -           | -           | -                                         | -                                        | -                                                                    |
|                                                              | <i>pagA</i>          | -          | -           | -           | -           | -                                         | -                                        | -                                                                    |
| <b>Anthrolysin<br/>O/Cereolysin<br/>O/Hemolysin I</b>        | <i>alo</i>           | -          | -           | -           | -           | +                                         | -                                        | -                                                                    |
| <b>Cereulide</b>                                             | <i>cesA</i>          | -          | -           | -           | -           | -                                         | -                                        | -                                                                    |
|                                                              | <i>cesB</i>          | -          | -           | -           | -           | -                                         | -                                        | -                                                                    |
|                                                              | <i>cesC</i>          | -          | -           | -           | -           | -                                         | -                                        | -                                                                    |
|                                                              | <i>cesD</i>          | -          | -           | -           | -           | -                                         | -                                        | -                                                                    |
|                                                              | <i>cesH</i>          | -          | -           | -           | -           | -                                         | -                                        | -                                                                    |
|                                                              | <i>cesP</i>          | -          | -           | -           | -           | -                                         | -                                        | -                                                                    |
|                                                              | <i>cesT</i>          | -          | -           | -           | -           | -                                         | -                                        | -                                                                    |
| <b>Certhrax</b>                                              | <i>cer</i>           | -          | -           | -           | -           | -                                         | -                                        | -                                                                    |
| <b>Cytotoxin K<br/>(Hemolysin IV)</b>                        | <i>cytK</i>          | -          | -           | -           | -           | +                                         | -                                        | -                                                                    |
| <b>Hemolysin II</b>                                          | <i>hlyII</i>         | -          | -           | -           | -           | +                                         | -                                        | -                                                                    |
| <b>Hemolysin III</b>                                         | <i>hlyIII</i>        | +          | +           | +           | +           | +                                         | +                                        | +                                                                    |
| <b>Hemolytic<br/>enterotoxin HBL</b>                         | <i>hblA</i>          | -          | -           | -           | -           | +                                         | -                                        | -                                                                    |
|                                                              | <i>hblC</i>          | -          | -           | -           | -           | +                                         | -                                        | -                                                                    |
|                                                              | <i>hblD</i>          | -          | -           | -           | -           | +                                         | -                                        | -                                                                    |
| <b>Insecticidal<br/>crystalline toxins</b>                   | <i>cry</i>           | -          | -           | -           | -           | -                                         | -                                        | -                                                                    |
|                                                              | <i>cyt</i>           | -          | -           | -           | -           | -                                         | -                                        | -                                                                    |
|                                                              | <i>vip</i>           | -          | -           | -           | -           | -                                         | -                                        | -                                                                    |
| <b>Non-hemolytic<br/>enterotoxin (Nhe)</b>                   | <i>nheA</i>          | -          | -           | -           | -           | +                                         | -                                        | -                                                                    |
|                                                              | <i>nheB</i>          | -          | -           | -           | -           | +                                         | -                                        | -                                                                    |
|                                                              | <i>nheC</i>          | -          | -           | -           | -           | +                                         | -                                        | -                                                                    |
| <b>Phytotoxin<br/>phaseolotoxin<br/>(<i>Pseudomonas</i>)</b> | <i>cysC1</i>         | +          | +           | -           | +           | -                                         | -                                        | -                                                                    |
| <b>Cytolysin<br/>(<i>Enterococcus</i>)</b>                   | <i>cylR2</i>         | -          | -           | -           | +           | -                                         | -                                        | -                                                                    |

**Table S3.** List of the most similar known clusters of NRPs found in the genomes of MV4, MV11, MV24, MV30.

|      | Type                            | Lenght<br>(bp) | Most<br>known cluster             | similar          | Similarity |
|------|---------------------------------|----------------|-----------------------------------|------------------|------------|
| MV4  | Terpene                         | 17265          | Unknown                           |                  |            |
|      | transAT-PKS                     | 87827          | Macrolactin H                     | Polyketide       | 100%       |
|      | transAT-PKS,T3PKS,NRPS          | 100368         | Bacillaene                        | Polyketide+NRP   | 100%       |
|      | NRPS,transAT-PKS,betalactone    | 107697         | Fengycin                          | NRP              | 86%        |
|      | Terpene                         | 21883          | Unknown                           |                  |            |
|      | T3PKS                           | 41100          | Unknown                           |                  |            |
|      | transAT-PKS                     | 93789          | Difficidin                        | Polyketide       | 100%       |
|      | NRPS,RiPP-like                  | 50498          | Bacillibactin                     | NRP              | 100%       |
|      | Other                           | 41418          | Bacilysin                         | Other            | 100%       |
|      | PKS-like                        | 41244          | Butirosin                         | Saccharide       | 7%         |
|      |                                 |                | A/butirosin B                     |                  |            |
|      | Phosphonate                     | 12141          | Unknown                           |                  |            |
|      | NRPS                            | 65011          | Surfactin                         | NRP:Lipopeptide  | 82%        |
|      | NRPS                            | 92475          | Fengycin                          | NRP              | 20%        |
| MV11 | terpene                         | 17265          | Unknown                           |                  |            |
|      | transAT-PKS                     | 87827          | macrolactin H                     | Polyketide       | 100%       |
|      | transAT-PKS,T3PKS,NRPS          | 100368         | bacillaene                        | Polyketide + NRP | 100%       |
|      | RiPP-like,NRP-metallophore,NRPS | 50498          | bacillibactin                     | NRP              | 100%       |
|      | other                           | 41418          | bacilysin                         | Other            | 100%       |
|      | transAT-PKS-like                | 65218          | difficidin                        | Polyketide + NRP | 53%        |
|      | T3PKS                           | 41100          | Unknown                           |                  |            |
|      | NRPS                            | 43212          | surfactin                         | NRP:Lipopeptide  | 39%        |
|      | transAT-PKS                     | 53939          | difficidin                        | Polyketide       | 46%        |
|      | PKS-like                        | 41244          | butirosin                         | Saccharide       | 7%         |
|      |                                 |                | A/butirosin B                     |                  |            |
|      | phosphonate                     | 12141          | Unknown                           |                  |            |
|      | NRPS                            | 43033          | Unknown                           |                  |            |
|      | NRPS,transAT-PKS,betalactone    | 107806         | fengycin                          | NRP              | 86%        |
| MV24 | terpene                         | 21883          | Unknown                           |                  |            |
|      | NRPS                            | 47196          | surfactin                         | NRP:Lipopeptide  | 47%        |
|      | transAT-PKS-like                | 63711          | difficidin                        | Polyketide + NRP | 26%        |
|      | NRPS                            | 95735          | fengycin                          | NRP              | 20%        |
|      | terpene                         | 20391          | Unknown                           |                  |            |
|      | NRP-metallophore,NRPS           | 45583          | bacillibactin                     | NRP              | 100%       |
|      | other                           | 41418          | bacilysin                         | Other            | 100%       |
|      | sactipeptide                    | 21611          | subtilosin A                      | RiPP:Thiopeptide | 100%       |
|      | NRPS-like,betalactone,NRPS      | 50754          | fengycin                          | NRP              | 100%       |
|      | T3PKS                           | 41097          | 1-carbapen-2-em-3-carboxylic acid | Other            | 16%        |
|      | terpene                         | 21898          | Unknown                           |                  |            |
|      | NRPS                            | 54627          | surfactin                         | NRP:Lipopeptide  | 78%        |
|      | terpene                         | 19989          | carotenoid                        | Terpene          | 50%        |
|      | phosphonate                     | 17423          |                                   |                  |            |
| MV30 |                                 |                |                                   |                  |            |

|                |       |                   |                 |     |
|----------------|-------|-------------------|-----------------|-----|
| RRE-containing | 20266 |                   |                 |     |
| T3PKS          | 41085 |                   |                 |     |
| RiPP-like      | 11436 |                   |                 |     |
| terpene        | 18349 | surfactin         | NRP:Lipopeptide | 13% |
| NI-siderophore | 16575 | synechobactin     | Other           | 23% |
|                |       | C9/synechobactin  |                 |     |
|                |       | C11/synechobactin |                 |     |
|                |       | 13/synechobactin  |                 |     |
|                |       | 14/synechobactin  |                 |     |
|                |       | 16/synechobactin  |                 |     |
|                |       | A/synechobactin   |                 |     |
|                |       | B/synechobactin C |                 |     |
| terpene        | 21868 |                   |                 |     |

---

**Table S4.** Matrix-related proteins putatively encoded by the genomes of MV4, MV11, MV24 and MV30.

| <b>Protein</b> | <b>Protein found in<br/>MV4<br/>(% identity)</b> | <b>Protein found in<br/>MV11<br/>(% identity)</b> | <b>Protein found in<br/>MV24<br/>(% identity)</b> | <b>Protein found in<br/>MV30<br/>(% identity)</b> |
|----------------|--------------------------------------------------|---------------------------------------------------|---------------------------------------------------|---------------------------------------------------|
| <b>TasA</b>    | MV4_1282 (83.5)                                  | Contig_2_93 (83.5)                                | MV24_1447 (99.2)                                  | MV30_0609 (37.3)                                  |
| <b>SipW</b>    | MV4_1283 (70.0)                                  | Contig_2_94 (70.0)                                | MV24_1446 (100)                                   | MV30_0424 (29.8)                                  |
| <b>TapA</b>    | MV4_1284 (48.2)                                  | Contig_2_95 (48.2)                                | MV24_1445 (98.4)                                  | MV30_4765 (37.9)                                  |
| <b>SinI</b>    | MV4_1280 (71.9)                                  | Contig_2_91 (71.9)                                | MV24_1449 (100)                                   | MV30_2683 (52.9)                                  |
| <b>SinR</b>    | MV4_1281 (97.6)                                  | Contig_2_92 (97.6)                                | MV24_1448 (100)                                   | MV30_2684 (43.2)                                  |
| <b>Spo0A</b>   | MV4_1243 (97.0)                                  | Contig_2_54 (97.0)                                | MV24_1487 (100)                                   | MV30_1811 (84.3)                                  |
| <b>EpsA</b>    | MV4_2261 (65.2)                                  | Contig_3_210 (65.2)                               | MV24_0888 (98.8)                                  | MV30_0512 (38.5)                                  |
| <b>EpsB</b>    | MV4_2262 (85.9)                                  | Contig_3_211 (85.9)                               | MV24_0889 (99.4)                                  | MV30_0513 (59.3)                                  |
| <b>EpsC</b>    | MV4_2263 (82.6)                                  | Contig_3_212 (82.6)                               | MV24_0890 (99.8)                                  | MV30_5596 (25.2)                                  |
| <b>EpsD</b>    | MV4_2264 (74.5)                                  | Contig_3_213 (74.5)                               | MV24_0891 (99.2)                                  | MV30_0500 (25.4)                                  |
| <b>EpsE</b>    | MV4_2265 (83.9)                                  | Contig_3_214 (83.9)                               | MV24_0892 (100)                                   | MV30_0496 (33.0)                                  |
| <b>EpsF</b>    | MV4_2266 (62.5)                                  | Contig_3_215 (62.5)                               | MV24_0893 (99.4)                                  | MV30_0500 (27.9)                                  |
| <b>EpsG</b>    | MV4_2267 (85.9)                                  | Contig_3_216 (85.9)                               | MV24_0894 (99.0)                                  | MV30_0502 (23.5)                                  |
| <b>EpsH</b>    | MV4_2268 (70.2)                                  | Contig_3_217 (70.2)                               | MV24_0895 (98.9)                                  | MV30_0501 (27.6)                                  |
| <b>EpsI</b>    | MV4_2269 (76.0)                                  | Contig_3_218 (76.0)                               | MV24_0896 (99.7)                                  | MV30_1501 (21.8)                                  |
| <b>EpsJ</b>    | MV4_2270 (64.1)                                  | Contig_3_219 (64.1)                               | MV24_0897 (89.2)                                  | MV30_0501 (36.7)                                  |
| <b>EpsK</b>    | MV4_2271 (77.2)                                  | Contig_3_220 (77.2)                               | MV24_0898 (98.2)                                  | MV30_1993 (22.0)                                  |
| <b>EpsL</b>    | MV4_2272 (79.4)                                  | Contig_3_221 (78.7)                               | MV24_0899 (97.0)                                  | MV30_0495 (42.9)                                  |
| <b>EpsM</b>    | MV4_2273 (69.2)                                  | Contig_3_222 (69.2)                               | MV24_0900 (96.6)                                  | MV30_5613 (33.8)                                  |
| <b>EpsN</b>    | MV4_2274 (73.2)                                  | Contig_3_223 (73.2)                               | MV24_0901 (97.8)                                  | MV30_5605 (31.3)                                  |
| <b>EpsO</b>    | MV4_2275 (65.2)                                  | Contig_3_224 (65.2)                               | MV24_0902 (99.6)                                  | MV30_5942 (28.9)                                  |
| <b>PurA</b>    | MV4_3474 (97.7)                                  | Contig_4_74 (97.7)                                | MV24_2773 (99.5)                                  | MV30_4676 (91.1)                                  |
| <b>PurB</b>    | MV4_3088 (96.9)                                  | Contig_7_55 (96.9)                                | MV24_1260 (100)                                   | MV30_4850 (84.7)                                  |
| <b>PurC</b>    | MV4_3087 (88.7)                                  | Contig_7_56 (88.7)                                | MV24_1259 (97.7)                                  | MV30_4849 (59.9)                                  |
| <b>PurD</b>    | MV4_3079 (86.1)                                  | Contig_7_64 (86.1)                                | MV24_1251 (99.7)                                  | MV30_4841 (66.7)                                  |
| <b>PurE</b>    | MV4_3090 (88.0)                                  | Contig_7_53 (88.0)                                | MV24_1262 (98.9)                                  | MV30_4852 (73.9)                                  |
| <b>PurF</b>    | MV4_3083 (98.3)                                  | Contig_7_60 (98.3)                                | MV24_1255 (100)                                   | MV30_4845 (79.4)                                  |
| <b>PurH</b>    | MV4_3080 (92.6)                                  | Contig_7_63 (92.6)                                | MV24_1252 (99.8)                                  | MV30_4842 (73.8)                                  |
| <b>PurK</b>    | MV4_3089 (83.0)                                  | Contig_7_54 (83.0)                                | MV24_1261 (98.2)                                  | MV30_4851 (51.6)                                  |
| <b>PurL</b>    | MV4_3084 (96.0)                                  | Contig_7_59 (96.0)                                | MV24_1256 (99.4)                                  | MV30_4846 (76.6)                                  |
| <b>PurM</b>    | MV4_3082 (95.0)                                  | Contig_7_61 (95.0)                                | MV24_1254 (99.6)                                  | MV30_4844 (73.0)                                  |
| <b>PurN</b>    | MV4_3081 (84.6)                                  | Contig_7_62 (84.6)                                | MV24_1253 (99.5)                                  | MV30_4843 (60.8)                                  |
| <b>PurQ</b>    | MV4_3085 (93.0)                                  | Contig_7_58 (93.4)                                | MV24_1257 (99.1)                                  | MV30_4847 (73.7)                                  |
| <b>PurS</b>    | MV4_3086 (100)                                   | Contig_7_57 (100.0)                               | MV24_1258 (100)                                   | MV30_4848 (92.9)                                  |
